# Supplementary material for: Phosphorus doped SnO2 thin films for transparent conducting oxide applications: synthesis, optoelectronic properties and computational models
Source: Royal Society of Chemistry journal article supplement (doi:10.1039/c8sc02152j), 2018-01-01
Supplement: c8sc02152j1.pdf [file c8sc02152j1.pdf]

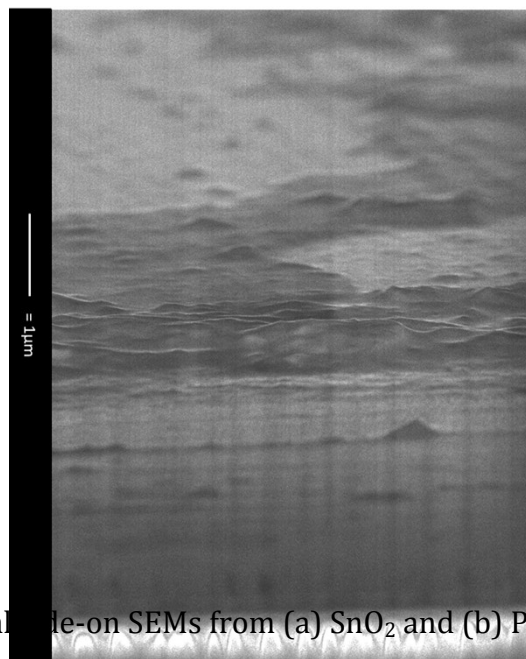

(a) (a)

Figure S1. Typical cross-sectional SEMs from (a) SnO<sub>2</sub> and (b) P-Doped SnO<sub>2</sub> films.

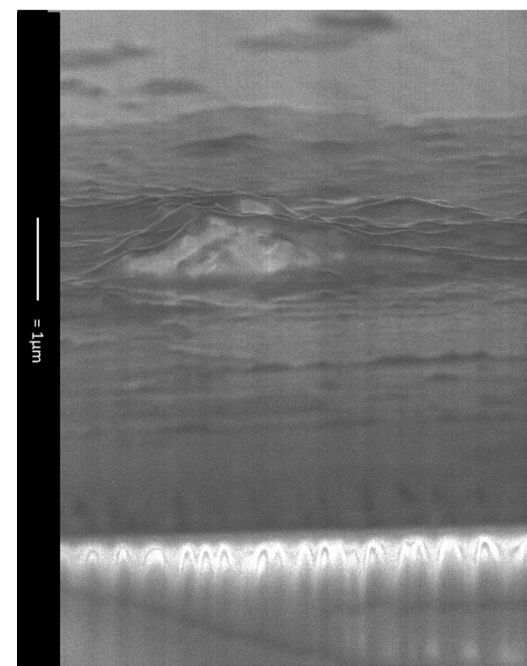

(b)
